# Supplementary material
Source: PubMed Central journal article supplement (PMC3350315)
Supplement: supp_msr181_Supplementary_Figure_2.pdf [file supp_msr181_Supplementary_Figure_2.pdf]

SPIN 0.25ng

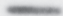

*Human*

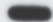

*Amphisbaena*

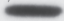

*Agama*

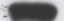

*Crocodylus*

SPIN 0.1ng

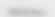

*Ameiva*

*Calabaria*

*Scincus*

*Apalone*

SPIN 0.05ng

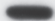

*Tenrec*

*Mesaspis*

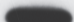

*Sistrurus*

*Lepidophyma*

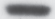

*Chelydra*

28S 0.25ng

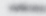

*Heloderma*

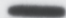

*Hypsiglena*

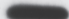

*Cordylus*

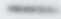

*Claudius*

28S 0.1ng

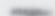

*Xenosaurus*

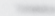

*Sceloporus*

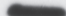

*Hemitheconyx*

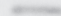

*Terrapene*

28S 0.05ng

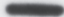

*Varanus*

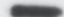

*Trioceros*

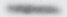

*Hemidactylus*
