# Supplementary material
Source: PubMed Central journal article supplement (PMC3350315)
Supplement: supp_msr181_Supplementary_Table_2.pdf [file supp_msr181_Supplementary_Table_2.pdf]

|     | Pairwise comparison              | Divergence time | SPIN | RAG1 | C-mos |
|-----|----------------------------------|-----------------|------|------|-------|
| 1   | Amphisbaenidae Vs Teiidae        | 139             | 0.27 | 0.31 | 0.30  |
| 2   | Amphisbaenidae Vs Agamidae       | 166             | 0.25 | 0.26 | 0.27  |
| 3   | Agamidae Vs Teiidae              | 166             | 0.24 | 0.27 | 0.27  |
| 4   | Natricidae Vs Teiidae            | 179             | 0.23 | 0.33 | 0.40  |
| 5   | Crotalus Vs Teiidae              | 179             | 0.22 | NA   | 0.49  |
| 6   | Agamidae Vs Scincidae            | 166             | 0.22 | 0.25 | 0.30  |
| 7   | Xantusiidae Vs Teiidae           | 169             | 0.22 | 0.24 | 0.47  |
| 8   | Scincidae Vs Teiidae             | 188             | 0.22 | 0.24 | 0.30  |
| 9   | Acanthopneuste Vs Xantusiidae    | 166             | 0.21 | 0.26 | 0.34  |
| 10  | Crotalus Vs Agamidae             | 166             | 0.21 | NA   | 0.35  |
| 11  | Natricidae Vs Agamidae           | 166             | 0.21 | 0.32 | 0.27  |
| 12  | Dipsadidae Vs Teiidae            | 179             | 0.20 | 0.31 | 0.46  |
| 13  | Teiidae Vs Sceloporus            | 166             | 0.20 | 0.23 | 0.40  |
| 14  | Sistrurus Vs Teiidae             | 179             | 0.20 | 0.33 | 0.46  |
| 15  | Dipsadidae Vs Agamidae           | 166             | 0.19 | 0.32 | 0.34  |
| 16  | Teiidae Vs Anolis                | 166             | 0.19 | 0.26 | 0.34  |
| 17  | Agamidae Vs Sceloporus           | 144             | 0.19 | 0.24 | 0.27  |
| 18  | Agkistrodon Vs Agamidae          | 166             | 0.18 | 0.32 | 0.27  |
| 19  | Sistrurus Vs Agamidae            | 166             | 0.18 | 0.33 | 0.34  |
| 20  | Agamidae Vs Anolis               | 144             | 0.18 | 0.23 | 0.21  |
| 21  | Agkistrodon Vs Teiidae           | 179             | 0.18 | 0.32 | 0.39  |
| 22  | Amphisbaenidae Vs Crotalus       | 179             | 0.17 | NA   | 0.35  |
| 23  | Varanidae Vs Teiidae             | 179             | 0.16 | 0.23 | 0.32  |
| 24  | Amphisbaenidae Vs Sceloporus     | 166             | 0.16 | 0.25 | 0.36  |
| 25  | Agkistrodon Vs Amphisbaenidae    | 179             | 0.16 | 0.28 | 0.27  |
| 26  | Amphisbaenidae Vs Natricidae     | 179             | 0.16 | 0.25 | 0.28  |
| 27  | Anguillidae Vs Teiidae           | 179             | 0.16 | 0.23 | 0.28  |
| 28  | Amphisbaenidae Vs Scincidae      | 139             | 0.16 | 0.28 | 0.24  |
| 29  | Teiidae Vs Cordylidae            | 188             | 0.16 | NA   | 0.32  |
| 30  | Amphisbaenidae Vs Xantusiidae    | 139             | 0.15 | 0.30 | 0.38  |
| 31  | Agamidae Vs Varanidae            | 166             | 0.15 | 0.24 | 0.25  |
| 32  | Amphisbaenidae Vs Sistrurus      | 179             | 0.15 | 0.28 | 0.31  |
| 33  | Amphisbaenidae Vs Dipsadidae     | 179             | 0.15 | 0.28 | 0.34  |
| 34  | Gekkonidae Vs Teiidae            | 197             | 0.15 | 0.25 | 0.29  |
| 35  | Anguillidae Vs Agamidae          | 166             | 0.14 | 0.21 | 0.18  |
| 36  | Amphisbaenidae Vs Anolis         | 166             | 0.14 | 0.24 | 0.27  |
| 37  | Agamidae Vs Cordylidae           | 166             | 0.14 | NA   | 0.31  |
| 38  | Helodermatidae Vs Teiidae        | 179             | 0.14 | 0.23 | 0.28  |
| 39  | Gekkonidae Vs Agamidae           | 166             | 0.14 | 0.31 | 0.26  |
| 40  | Agkistrodon Vs Natricidae        | 54              | 0.13 | 0.06 | 0.05  |
| 41  | Helodermatidae Vs Agamidae       | 166             | 0.13 | 0.22 | 0.16  |
| 42  | Crotalus Vs Natricidae           | 54              | 0.13 | NA   | 0.05  |
| 43  | Crotalus Vs Sceloporus           | 166             | 0.13 | NA   | 0.31  |
| 44  | Crotalus Vs Scincidae            | 179             | 0.12 | NA   | 0.38  |
| 45  | Dipsadidae Vs Scincidae          | 179             | 0.12 | 0.31 | 0.36  |
| 46  | Agkistrodon Vs Anolis            | 166             | 0.12 | 0.29 | 0.29  |
| 47  | Dipsadidae Vs Natricidae         | 39              | 0.12 | 0.04 | 0.03  |
| 48  | Natricidae Vs Scincidae          | 179             | 0.12 | 0.31 | 0.35  |
| 49  | Natricidae Vs Anolis             | 166             | 0.12 | 0.29 | 0.30  |
| 50  | Amphisbaenidae Vs Cordylidae     | 139             | 0.12 | NA   | 0.25  |
| 51  | Scincidae Vs Anolis              | 166             | 0.12 | 0.23 | 0.22  |
| 52  | Agkistrodon Vs Dipsadidae        | 54              | 0.11 | 0.06 | 0.09  |
| 53  | Agkistrodon Vs Xantusiidae       | 179             | 0.11 | 0.33 | 0.34  |
| 54  | Natricidae Vs Xantusiidae        | 179             | 0.11 | 0.33 | 0.36  |
| 55  | Sistrurus Vs Scincidae           | 179             | 0.11 | 0.33 | 0.38  |
| 56  | Sistrurus Vs Natricidae          | 54              | 0.11 | 0.06 | 0.04  |
| 57  | Agkistrodon Vs Sceloporus        | 166             | 0.11 | 0.29 | 0.30  |
| 58  | Sistrurus Vs Sceloporus          | 166             | 0.11 | 0.27 | 0.29  |
| 59  | Amphisbaenidae Vs Anguillidae    | 179             | 0.11 | 0.20 | 0.19  |
| 60  | Crotalus Vs Xantusiidae          | 179             | 0.11 | NA   | 0.33  |
| 61  | Amphisbaenidae Vs Gekkonidae     | 197             | 0.11 | 0.30 | 0.28  |
| 62  | Amphisbaenidae Vs Varanidae      | 179             | 0.11 | 0.22 | 0.21  |
| 63  | Xantusiidae Vs Anolis            | 166             | 0.10 | 0.26 | 0.26  |
| 64  | Crotalus Vs Dipsadidae           | 54              | 0.10 | NA   | 0.06  |
| 65  | Sistrurus Vs Xantusiidae         | 179             | 0.10 | 0.34 | 0.33  |
| 66  | Crotalus Vs Anolis               | 166             | 0.10 | NA   | 0.33  |
| 67  | Scincidae Vs Xantusiidae         | 161             | 0.09 | 0.20 | 0.23  |
| 68  | Dipsadidae Vs Sceloporus         | 166             | 0.09 | 0.24 | 0.33  |
| 69  | Amphisbaenidae Vs Helodermatidae | 179             | 0.09 | 0.20 | 0.19  |
| 70  | Sistrurus Vs Dipsadidae          | 54              | 0.09 | 0.05 | 0.05  |
| 71  | Dipsadidae Vs Xantusiidae        | 179             | 0.09 | 0.30 | 0.37  |
| 72  | Anolis Vs Sceloporus             | 74              | 0.09 | 0.11 | 0.16  |
| 73  | Agkistrodon Vs Scincidae         | 179             | 0.09 | 0.32 | 0.33  |
| 74  | Crotalus Vs Varanidae            | 166             | 0.09 | NA   | 0.29  |
| 75  | Dipsadidae Vs Anolis             | 166             | 0.09 | 0.27 | 0.37  |
| 76  | Agkistrodon Vs Varanidae         | 166             | 0.09 | 0.27 | 0.24  |
| 77  | Scincidae Vs Sceloporus          | 166             | 0.08 | 0.24 | 0.27  |
| 78  | Xantusiidae Vs Sceloporus        | 166             | 0.08 | 0.23 | 0.32  |
| 79  | Natricidae Vs Varanidae          | 166             | 0.08 | 0.27 | 0.26  |
| 80  | Scincidae Vs Varanidae           | 179             | 0.08 | 0.24 | 0.24  |
| 81  | Sistrurus Vs Anolis              | 166             | 0.08 | 0.30 | 0.34  |
| 82  | Xantusiidae Vs Varanidae         | 179             | 0.08 | 0.24 | 0.30  |
| 83  | Dipsadidae Vs Varanidae          | 166             | 0.08 | 0.25 | 0.30  |
| 84  | Crotalus Vs Anguillidae          | 166             | 0.08 | NA   | 0.28  |
| 85  | Crotalus Vs Cordylidae           | 179             | 0.08 | NA   | 0.29  |
| 86  | Varanidae Vs Anolis              | 166             | 0.08 | 0.19 | 0.18  |
| 87  | Agkistrodon Vs Anguillidae       | 166             | 0.07 | 0.28 | 0.22  |
| 88  | Sistrurus Vs Varanidae           | 166             | 0.07 | 0.28 | 0.28  |
| 89  | Natricidae Vs Cordylidae         | 179             | 0.07 | NA   | 0.29  |
| 90  | Scincidae Vs Cordylidae          | 179             | 0.07 | 0.21 | 0.21  |
| 91  | Anguillidae Vs Scincidae         | 179             | 0.07 | 0.21 | 0.22  |
| 92  | Xantusiidae Vs Cordylidae        | 161             | 0.07 | NA   | 0.27  |
| 93  | Varanidae Vs Sceloporus          | 166             | 0.07 | 0.21 | 0.24  |
| 94  | Gekkonidae Vs Scincidae          | 197             | 0.07 | 0.27 | 0.28  |
| 95  | Crotalus Vs Gekkonidae           | 197             | 0.07 | NA   | 0.29  |
| 96  | Natricidae Vs Sceloporus         | 166             | 0.07 | 0.26 | 0.21  |
| 97  | Agkistrodon Vs Gekkonidae        | 197             | 0.06 | 0.26 | 0.26  |
| 98  | Crotalus Vs Helodermatidae       | 166             | 0.06 | NA   | 0.25  |
| 99  | Natricidae Vs Gekkonidae         | 197             | 0.06 | 0.29 | 0.23  |
| 100 | Natricidae Vs Anguillidae        | 166             | 0.06 | 0.27 | 0.23  |
| 101 | Anguillidae Vs Anolis            | 166             | 0.06 | 0.19 | 0.20  |
| 102 | Anguillidae Vs Xantusiidae       | 179             | 0.06 | 0.19 | 0.27  |
| 103 | Dipsadidae Vs Anguillidae        | 166             | 0.06 | 0.26 | 0.28  |
| 104 | Gekkonidae Vs Xantusiidae        | 197             | 0.06 | 0.26 | 0.38  |
| 105 | Sistrurus Vs Cordylidae          | 179             | 0.06 | NA   | 0.29  |
| 106 | Sistrurus Vs Anguillidae         | 166             | 0.06 | 0.29 | 0.27  |
| 107 | Agkistrodon Vs Cordylidae        | 179             | 0.06 | NA   | 0.26  |
| 108 | Agkistrodon Vs Helodermatidae    | 166             | 0.06 | 0.26 | 0.21  |
| 109 | Anolis Vs Cordylidae             | 166             | 0.06 | NA   | 0.25  |
| 110 | Helodermatidae Vs Scincidae      | 179             | 0.06 | 0.20 | 0.18  |
| 111 | Sceloporus Vs Cordylidae         | 166             | 0.06 | NA   | 0.31  |
| 112 | Dipsadidae Vs Cordylidae         | 179             | 0.05 | NA   | 0.21  |
| 113 | Gekkonidae Vs Anolis             | 166             | 0.05 | 0.23 | 0.24  |
| 114 | Dipsadidae Vs Gekkonidae         | 197             | 0.05 | 0.27 | 0.26  |
| 115 | Sistrurus Vs Gekkonidae          | 197             | 0.05 | 0.27 | 0.30  |
| 116 | Natricidae Vs Helodermatidae     | 166             | 0.05 | 0.25 | 0.21  |
| 117 | Helodermatidae Vs Anolis         | 166             | 0.05 | 0.19 | 0.13  |
| 118 | Helodermatidae Vs Xantusiidae    | 179             | 0.05 | 0.20 | 0.25  |
| 119 | Gekkonidae Vs Sceloporus         | 166             | 0.05 | 0.20 | 0.29  |
| 120 | Dipsadidae Vs Helodermatidae     | 166             | 0.05 | 0.24 | 0.27  |
| 121 | Sistrurus Vs Helodermatidae      | 166             | 0.05 | 0.27 | 0.25  |
| 122 | Anguillidae Vs Sceloporus        | 166             | 0.05 | 0.19 | 0.26  |
| 123 | Helodermatidae Vs Sceloporus     | 166             | 0.04 | 0.19 | 0.24  |
| 124 | Varanidae Vs Cordylidae          | 179             | 0.04 | NA   | 0.27  |
| 125 | Agkistrodon Vs Crotalus          | 22              | 0.04 | NA   | 0.02  |
| 126 | Anguillidae Vs Varanidae         | 127             | 0.03 | 0.12 | 0.16  |
| 127 | Agkistrodon Vs Sistrurus         | 22              | 0.03 | 0.01 | 0.01  |
| 128 | Gekkonidae Vs Varanidae          | 197             | 0.03 | 0.24 | 0.27  |
| 129 | Anguillidae Vs Cordylidae        | 179             | 0.02 | NA   | 0.24  |
| 130 | Helodermatidae Vs Varanidae      | 127             | 0.02 | 0.11 | 0.13  |
| 131 | Gekkonidae Vs Cordylidae         | 197             | 0.02 | NA   | 0.29  |
| 132 | Gekkonidae Vs Anguillidae        | 197             | 0.02 | 0.22 | 0.27  |
| 133 | Helodermatidae Vs Cordylidae     | 179             | 0.01 | NA   | 0.21  |
| 134 | Sistrurus Vs Crotalus            | 12              | 0.01 | NA   | 0.01  |
| 135 | Anguillidae Vs Helodermatidae    | 105             | 0.01 | 0.07 | 0.10  |
| 136 | Gekkonidae Vs Helodermatidae     | 197             | 0.01 | 0.22 | 0.24  |
