# Supplementary material
Source: PubMed Central journal article supplement (PMC3350315)

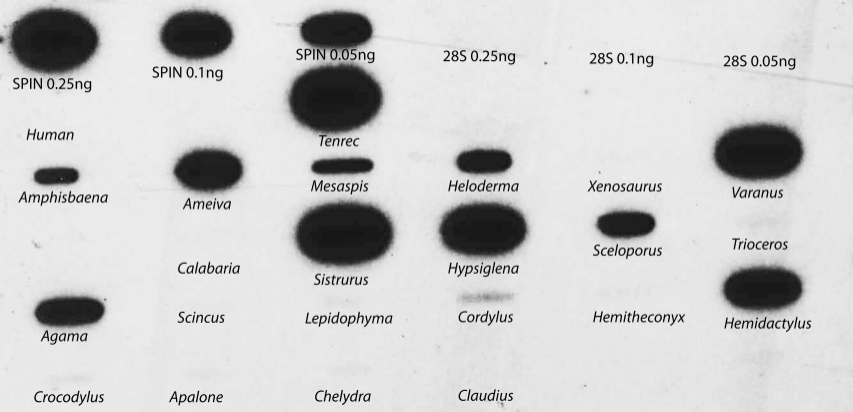

Supplement: supp_msr181_Supplementary_Figure_1.pdf [file supp_msr181_Supplementary_Figure_1.pdf]
